# Supplementary material for: An expert-based job exposure matrix for large scale epidemiologic studies of primary hip and knee osteoarthritis: The Lower Body JEM
Source: Springer Nature journal article supplement (doi:10.1186/1471-2474-15-204), 2014-06-13
Supplement: 12891_2013_2154_MOESM1_ESM.pdf [file 12891_2013_2154_MOESM1_ESM.pdf]

Total D-ISCO 88<sup>¶</sup>  
2227 occupational titles  
372 D-ISCO codes

Excluded  
1421 and 117 occupational titles with minimal exposure to the lower limbs or obsolete/very rare, respectively

Occupational titles for grouping  
689 occupational titles  
168 D-ISCO 88 codes

Grouping of occupational titles according to exposure profiles

Total number of job groups  
121 job groups
